# Supplementary material
Source: PubMed Central journal article supplement (PMC3753180)
Supplement: NIHMS497557-supplement-Supp_Fig_S1_Table_S1.pdf [file NIHMS497557-supplement-Supp_Fig_S1_Table_S1.pdf]

## Supplemental Figure 1

Lieber-deCarli diet

Cy3: Pair-fed

Cy5: Ethanol-fed

Cy3/Cy5 ratio

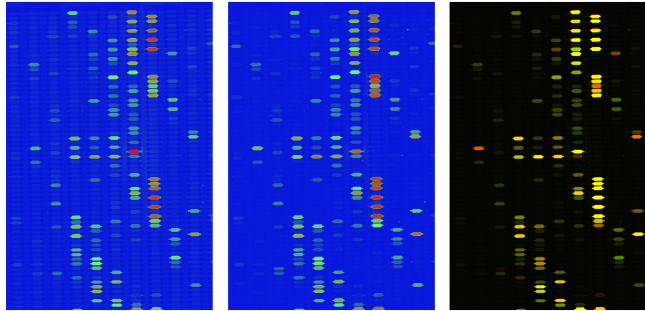

MCD diet

Cy3: MCD

Cy5: MCS

Cy3/Cy5 ratio

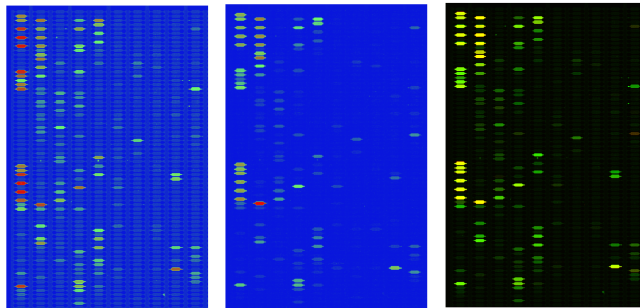

Layout#  
notes

|     | C1         | C2         | C3         | C4         | C5         | C6         |
|-----|------------|------------|------------|------------|------------|------------|
| R1  |            |            |            |            |            |            |
| R2  | PUC2PM     |            |            |            |            |            |
| R3  | PUC2MM     | mmu-let-7a | mmu-miR-13 | mmu-miR-19 | mmu-miR-26 | mmu-miR-32 |
| R4  | BKG0       | mmu-let-7a | mmu-miR-13 | mmu-miR-19 | mmu-miR-26 | mmu-miR-32 |
| R5  | PUC2PM-20B | mmu-let-7b | mmu-miR-13 | mmu-miR-19 | mmu-miR-26 | mmu-miR-32 |
| R6  | PUC2MM-20B | mmu-let-7b | mmu-miR-13 | mmu-miR-19 | mmu-miR-27 | mmu-miR-32 |
| R7  | a2-PUC2PM- | mmu-let-7c | mmu-miR-13 | mmu-miR-19 | mmu-miR-27 | mmu-miR-32 |
| R8  | a2-PUC2MM- | mmu-let-7c | mmu-miR-13 | mmu-miR-19 | mmu-miR-27 | mmu-miR-32 |
| R9  | a3-PUC2PM- | mmu-let-7d | mmu-miR-13 | mmu-miR-19 | mmu-miR-27 | mmu-miR-32 |
| R10 | a3-PUC2MM- | mmu-let-7d | mmu-miR-13 | mmu-miR-19 | mmu-miR-28 | mmu-miR-32 |
| R11 |            | mmu-let-7e | mmu-miR-13 | mmu-miR-19 | mmu-miR-28 | mmu-miR-33 |
| R12 |            | mmu-let-7f | mmu-miR-13 | mmu-miR-19 | mmu-miR-29 | mmu-miR-33 |
| R13 |            | mmu-let-7f | mmu-miR-13 | mmu-miR-19 | mmu-miR-29 | mmu-miR-33 |
| R14 |            | mmu-let-7g | mmu-miR-14 | mmu-miR-19 | mmu-miR-29 | mmu-miR-33 |
| R15 | mmu-5S-b1  | mmu-let-7g | mmu-miR-14 | mmu-miR-19 | mmu-miR-29 | mmu-miR-33 |
| R16 | mmu-5S-b2  | mmu-let-7i | mmu-miR-14 | mmu-miR-19 | mmu-miR-29 | mmu-miR-33 |
| R17 | mmu-5S-b3  | mmu-let-7i | mmu-miR-14 | mmu-miR-19 | mmu-miR-29 | mmu-miR-33 |
| R18 | mmu-5S-b4  | mmu-miR-1  | mmu-miR-14 | mmu-miR-19 | mmu-miR-29 | mmu-miR-33 |
| R19 | mmu-5S-b5  | mmu-miR-10 | mmu-miR-14 | mmu-miR-19 | mmu-miR-29 | mmu-miR-33 |
| R20 |            | mmu-miR-10 | mmu-miR-14 | mmu-miR-19 | mmu-miR-29 | mmu-miR-33 |
| R21 |            | mmu-miR-10 | mmu-miR-14 | mmu-miR-20 | mmu-miR-29 | mmu-miR-33 |
| R22 |            | mmu-miR-10 | mmu-miR-14 | mmu-miR-20 | mmu-miR-29 | mmu-miR-33 |
| R23 |            | mmu-miR-10 | mmu-miR-14 | mmu-miR-20 | mmu-miR-29 | mmu-miR-33 |
| R24 |            | mmu-miR-10 | mmu-miR-14 | mmu-miR-20 | mmu-miR-29 | mmu-miR-33 |
| R25 |            | mmu-miR-10 | mmu-miR-14 | mmu-miR-20 | mmu-miR-29 | mmu-miR-34 |
| R26 |            | mmu-miR-10 | mmu-miR-14 | mmu-miR-20 | mmu-miR-29 | mmu-miR-34 |
| R27 |            | mmu-miR-10 | mmu-miR-14 | mmu-miR-20 | mmu-miR-29 | mmu-miR-34 |
| R28 |            | mmu-miR-10 | mmu-miR-14 | mmu-miR-20 | mmu-miR-29 | mmu-miR-34 |
| R29 |            | mmu-miR-10 | mmu-miR-14 | mmu-miR-20 | mmu-miR-29 | mmu-miR-34 |
| R30 |            | mmu-miR-10 | mmu-miR-14 | mmu-miR-20 | mmu-miR-29 | mmu-miR-34 |
| R31 |            | mmu-miR-10 | mmu-miR-14 | mmu-miR-20 | mmu-miR-29 | mmu-miR-34 |
| R32 |            | mmu-miR-10 | mmu-miR-15 | mmu-miR-20 | mmu-miR-29 | mmu-miR-34 |
| R33 |            | mmu-miR-11 | mmu-miR-15 | mmu-miR-20 | mmu-miR-29 | mmu-miR-34 |
| R34 |            | mmu-miR-11 | mmu-miR-15 | mmu-miR-20 | mmu-miR-29 | mmu-miR-34 |
| R35 |            | mmu-miR-11 | mmu-miR-15 | mmu-miR-20 | mmu-miR-29 | mmu-miR-34 |
| R36 | BKG0       | mmu-miR-11 | mmu-miR-15 | mmu-miR-20 | mmu-miR-29 | mmu-miR-34 |
| R37 | PUC2PM     | mmu-miR-11 | mmu-miR-15 | mmu-miR-20 | mmu-miR-29 | mmu-miR-34 |
| R38 | PUC2MM     | mmu-miR-11 | mmu-miR-15 | mmu-miR-20 | mmu-miR-29 | mmu-miR-34 |
| R39 | PUC2PM-20B | mmu-miR-11 | mmu-miR-15 | mmu-miR-20 | mmu-miR-29 | mmu-miR-34 |

|     |            |                                                        |
|-----|------------|--------------------------------------------------------|
| R40 | PUC2MM-20B | mmu-miR-11 mmu-miR-15 mmu-miR-20 mmu-miR-29 mmu-miR-35 |
| R41 | a2-PUC2PM- | mmu-miR-11 mmu-miR-15 mmu-miR-20 mmu-miR-30 mmu-miR-35 |
| R42 | a2-PUC2MM- | mmu-miR-11 mmu-miR-15 mmu-miR-21 mmu-miR-30 mmu-miR-36 |
| R43 | a3-PUC2PM- | mmu-miR-11 mmu-miR-15 mmu-miR-21 mmu-miR-30 mmu-miR-36 |
| R44 | a3-PUC2MM- | mmu-miR-11 mmu-miR-15 mmu-miR-21 mmu-miR-30 mmu-miR-36 |
| R45 | a-PUC2PM   | mmu-miR-11 mmu-miR-16 mmu-miR-21 mmu-miR-30 mmu-miR-36 |
| R46 | a-PUC2MM2d | mmu-miR-12 mmu-miR-16 mmu-miR-21 mmu-miR-30 mmu-miR-36 |
| R47 | Ctr01-3P   | mmu-miR-12 mmu-miR-17 mmu-miR-21 mmu-miR-30 mmu-miR-36 |
| R48 | Ctr01-3M05 | mmu-miR-12 mmu-miR-17 mmu-miR-21 mmu-miR-30 mmu-miR-36 |
| R49 | Ctr01-3M10 | mmu-miR-12 mmu-miR-18 mmu-miR-21 mmu-miR-30 mmu-miR-36 |
| R50 | Ctr02-3P   | mmu-miR-12 mmu-miR-18 mmu-miR-21 mmu-miR-30 mmu-miR-37 |
| R51 | Ctr02-3M05 | mmu-miR-12 mmu-miR-18 mmu-miR-21 mmu-miR-30 mmu-miR-37 |
| R52 | Ctr02-3M10 | mmu-miR-12 mmu-miR-18 mmu-miR-21 mmu-miR-30 mmu-miR-37 |
| R53 | Ctr03-3P   | mmu-miR-12 mmu-miR-18 mmu-miR-21 mmu-miR-30 mmu-miR-37 |
| R54 | Ctr03-3M05 | mmu-miR-12 mmu-miR-18 mmu-miR-21 mmu-miR-30 mmu-miR-37 |
| R55 | Ctr03-3M10 | mmu-miR-12 mmu-miR-18 mmu-miR-21 mmu-miR-30 mmu-miR-37 |
| R56 | Ctr04-3P   | mmu-miR-12 mmu-miR-18 mmu-miR-21 mmu-miR-30 mmu-miR-37 |
| R57 | Ctr04-3M05 | mmu-miR-12 mmu-miR-18 mmu-miR-22 mmu-miR-30 mmu-miR-37 |
| R58 | Ctr04-3M10 | mmu-miR-12 mmu-miR-18 mmu-miR-22 mmu-miR-30 mmu-miR-37 |
| R59 | Ctr05-3P   | mmu-miR-12 mmu-miR-18 mmu-miR-22 mmu-miR-30 mmu-miR-37 |
| R60 | Ctr05-3M05 | mmu-miR-12 mmu-miR-18 mmu-miR-22 mmu-miR-30 mmu-miR-37 |
| R61 | Ctr05-3M10 | mmu-miR-12 mmu-miR-18 mmu-miR-22 mmu-miR-30 mmu-miR-37 |
| R62 | Ctr06-3P   | mmu-miR-13 mmu-miR-18 mmu-miR-22 mmu-miR-31 mmu-miR-37 |
| R63 | Ctr06-3M05 | mmu-miR-13 mmu-miR-18 mmu-miR-22 mmu-miR-31 mmu-miR-37 |
| R64 | Ctr06-3M10 | mmu-miR-13 mmu-miR-18 mmu-miR-23 mmu-miR-32 mmu-miR-38 |
| R65 | Ctr07-3P   | mmu-miR-13 mmu-miR-18 mmu-miR-23 mmu-miR-32 mmu-miR-38 |
| R66 | Ctr07-3M05 | mmu-miR-13 mmu-miR-18 mmu-miR-24 mmu-miR-32 mmu-miR-38 |
| R67 | Ctr07-3M10 | mmu-miR-13 mmu-miR-18 mmu-miR-24 mmu-miR-32 mmu-miR-38 |
| R68 | Ctr08-3P   | mmu-miR-13 mmu-miR-19 mmu-miR-24 mmu-miR-32 mmu-miR-38 |
| R69 | Ctr08-3M05 | mmu-miR-13 mmu-miR-19 mmu-miR-25 mmu-miR-32 mmu-miR-38 |
| R70 | Ctr08-3M10 |                                                        |
| R71 | Ctr09-3P   |                                                        |
| R72 | Ctr09-3M05 |                                                        |
| R73 | Ctr09-3M10 |                                                        |
| R74 | Ctr10-3P   |                                                        |
| R75 | Ctr10-3M05 |                                                        |
| R76 | Ctr10-3M10 |                                                        |
| R77 | Ctr11-3P   |                                                        |
| R78 | Ctr11-3M05 |                                                        |
| R79 | Ctr11-3M10 | mmu-let-7a mmu-miR-13 mmu-miR-19 mmu-miR-26 mmu-miR-32 |
| R80 | PUC2PM-20B | mmu-let-7a mmu-miR-13 mmu-miR-19 mmu-miR-26 mmu-miR-32 |
| R81 | PUC2MM-20B | mmu-let-7b mmu-miR-13 mmu-miR-19 mmu-miR-26 mmu-miR-32 |

|      |            |                                                        |
|------|------------|--------------------------------------------------------|
| R82  | BKG0       | mmu-let-7b mmu-miR-13 mmu-miR-19 mmu-miR-27 mmu-miR-32 |
| R83  | PUC2PM     | mmu-let-7c mmu-miR-13 mmu-miR-19 mmu-miR-27 mmu-miR-32 |
| R84  | PUC2MM     | mmu-let-7c mmu-miR-13 mmu-miR-19 mmu-miR-27 mmu-miR-32 |
| R85  | a2-PUC2PM- | mmu-let-7d mmu-miR-13 mmu-miR-19 mmu-miR-27 mmu-miR-32 |
| R86  | a2-PUC2MM- | mmu-let-7d mmu-miR-13 mmu-miR-19 mmu-miR-28 mmu-miR-32 |
| R87  | a3-PUC2PM- | mmu-let-7e mmu-miR-13 mmu-miR-19 mmu-miR-28 mmu-miR-33 |
| R88  | a3-PUC2MM- | mmu-let-7f mmu-miR-13 mmu-miR-19 mmu-miR-29 mmu-miR-33 |
| R89  |            | mmu-let-7f mmu-miR-13 mmu-miR-19 mmu-miR-29 mmu-miR-33 |
| R90  |            | mmu-let-7g mmu-miR-14 mmu-miR-19 mmu-miR-29 mmu-miR-33 |
| R91  |            | mmu-let-7g mmu-miR-14 mmu-miR-19 mmu-miR-29 mmu-miR-33 |
| R92  |            | mmu-let-7i mmu-miR-14 mmu-miR-19 mmu-miR-29 mmu-miR-33 |
| R93  |            | mmu-let-7i mmu-miR-14 mmu-miR-19 mmu-miR-29 mmu-miR-33 |
| R94  |            | mmu-miR-1 mmu-miR-14 mmu-miR-19 mmu-miR-29 mmu-miR-33  |
| R95  |            | mmu-miR-10 mmu-miR-14 mmu-miR-19 mmu-miR-29 mmu-miR-33 |
| R96  |            | mmu-miR-10 mmu-miR-14 mmu-miR-19 mmu-miR-29 mmu-miR-33 |
| R97  |            | mmu-miR-10 mmu-miR-14 mmu-miR-20 mmu-miR-29 mmu-miR-33 |
| R98  |            | mmu-miR-10 mmu-miR-14 mmu-miR-20 mmu-miR-29 mmu-miR-33 |
| R99  |            | mmu-miR-10 mmu-miR-14 mmu-miR-20 mmu-miR-29 mmu-miR-33 |
| R100 |            | mmu-miR-10 mmu-miR-14 mmu-miR-20 mmu-miR-29 mmu-miR-33 |
| R101 |            | mmu-miR-10 mmu-miR-14 mmu-miR-20 mmu-miR-29 mmu-miR-34 |
| R102 |            | mmu-miR-10 mmu-miR-14 mmu-miR-20 mmu-miR-29 mmu-miR-34 |
| R103 |            | mmu-miR-10 mmu-miR-14 mmu-miR-20 mmu-miR-29 mmu-miR-34 |
| R104 |            | mmu-miR-10 mmu-miR-14 mmu-miR-20 mmu-miR-29 mmu-miR-34 |
| R105 |            | mmu-miR-10 mmu-miR-14 mmu-miR-20 mmu-miR-29 mmu-miR-34 |
| R106 |            | mmu-miR-10 mmu-miR-14 mmu-miR-20 mmu-miR-29 mmu-miR-34 |
| R107 |            | mmu-miR-10 mmu-miR-14 mmu-miR-20 mmu-miR-29 mmu-miR-34 |
| R108 |            | mmu-miR-10 mmu-miR-15 mmu-miR-20 mmu-miR-29 mmu-miR-34 |
| R109 |            | mmu-miR-11 mmu-miR-15 mmu-miR-20 mmu-miR-29 mmu-miR-34 |
| R110 |            | mmu-miR-11 mmu-miR-15 mmu-miR-20 mmu-miR-29 mmu-miR-34 |
| R111 |            | mmu-miR-11 mmu-miR-15 mmu-miR-20 mmu-miR-29 mmu-miR-34 |
| R112 |            | mmu-miR-11 mmu-miR-15 mmu-miR-20 mmu-miR-29 mmu-miR-34 |
| R113 |            | mmu-miR-11 mmu-miR-15 mmu-miR-20 mmu-miR-29 mmu-miR-34 |
| R114 |            | mmu-miR-11 mmu-miR-15 mmu-miR-20 mmu-miR-29 mmu-miR-34 |
| R115 |            | mmu-miR-11 mmu-miR-15 mmu-miR-20 mmu-miR-29 mmu-miR-34 |
| R116 |            | mmu-miR-11 mmu-miR-15 mmu-miR-20 mmu-miR-29 mmu-miR-35 |
| R117 |            | mmu-miR-11 mmu-miR-15 mmu-miR-20 mmu-miR-30 mmu-miR-35 |
| R118 |            | mmu-miR-11 mmu-miR-15 mmu-miR-21 mmu-miR-30 mmu-miR-36 |
| R119 |            | mmu-miR-11 mmu-miR-15 mmu-miR-21 mmu-miR-30 mmu-miR-36 |
| R120 | a2-PUC2PM- | mmu-miR-11 mmu-miR-15 mmu-miR-21 mmu-miR-30 mmu-miR-36 |
| R121 | a2-PUC2MM- | mmu-miR-11 mmu-miR-16 mmu-miR-21 mmu-miR-30 mmu-miR-36 |
| R122 | a3-PUC2PM- | mmu-miR-12 mmu-miR-16 mmu-miR-21 mmu-miR-30 mmu-miR-36 |
| R123 | a3-PUC2MM- | mmu-miR-12 mmu-miR-17 mmu-miR-21 mmu-miR-30 mmu-miR-36 |

|      |            |                                                        |
|------|------------|--------------------------------------------------------|
| R124 | PUC2PM-20B | mmu-miR-12:mmu-miR-17:mmu-miR-21:mmu-miR-30:mmu-miR-36 |
| R125 | PUC2MM-20B | mmu-miR-12:mmu-miR-18:mmu-miR-21:mmu-miR-30:mmu-miR-36 |
| R126 | BKG0       | mmu-miR-12:mmu-miR-18:mmu-miR-21:mmu-miR-30:mmu-miR-37 |
| R127 | PUC2PM     |                                                        |
| R128 | PUC2MM     |                                                        |
| stop |            |                                                        |

| C7         | C8         | C9         | C10             | C11        | C12        | C13        |
|------------|------------|------------|-----------------|------------|------------|------------|
|            |            |            |                 | PUC2PM     |            |            |
| mmu-miR-38 | mmu-miR-46 | mmu-miR-66 | mmu-miR-71      | PUC2MM     | mmu-miR-12 | mmu-miR-18 |
| mmu-miR-38 | mmu-miR-46 | mmu-miR-66 | mmu-miR-71      | BKG0       | mmu-miR-12 | mmu-miR-18 |
| mmu-miR-40 | mmu-miR-46 | mmu-miR-66 | mmu-miR-72      | PUC2PM-20B | mmu-miR-12 | mmu-miR-18 |
| mmu-miR-40 | mmu-miR-47 | mmu-miR-66 | mmu-miR-72      | PUC2MM-20B | mmu-miR-12 | mmu-miR-18 |
| mmu-miR-41 | mmu-miR-47 | mmu-miR-66 | mmu-miR-74      | a2-PUC2PM- | mmu-miR-12 | mmu-miR-18 |
| mmu-miR-41 | mmu-miR-47 | mmu-miR-66 | mmu-miR-74      | a2-PUC2MM- | mmu-miR-12 | mmu-miR-18 |
| mmu-miR-41 | mmu-miR-48 | mmu-miR-66 | mmu-miR-74      | a3-PUC2PM- | mmu-miR-12 | mmu-miR-18 |
| mmu-miR-41 | mmu-miR-48 | mmu-miR-66 | mmu-miR-74      | a3-PUC2MM- | mmu-miR-12 | mmu-miR-18 |
| mmu-miR-42 | mmu-miR-48 | mmu-miR-66 | mmu-miR-743b-3p |            | mmu-miR-12 | mmu-miR-18 |
| mmu-miR-42 | mmu-miR-48 | mmu-miR-66 | mmu-miR-743b-5p |            | mmu-miR-12 | mmu-miR-18 |
| mmu-miR-42 | mmu-miR-48 | mmu-miR-66 | mmu-miR-744     |            | mmu-miR-12 | mmu-miR-18 |
| mmu-miR-42 | mmu-miR-48 | mmu-miR-66 | mmu-miR-744*    |            | mmu-miR-12 | mmu-miR-18 |
| mmu-miR-42 | mmu-miR-48 | mmu-miR-67 | mmu-miR-75      | mmu-5S-b1  | mmu-miR-13 | mmu-miR-18 |
| mmu-miR-42 | mmu-miR-48 | mmu-miR-67 | mmu-miR-75      | mmu-5S-b2  | mmu-miR-13 | mmu-miR-18 |
| mmu-miR-43 | mmu-miR-48 | mmu-miR-67 | mmu-miR-76      | mmu-5S-b3  | mmu-miR-13 | mmu-miR-18 |
| mmu-miR-43 | mmu-miR-48 | mmu-miR-67 | mmu-miR-76      | mmu-5S-b4  | mmu-miR-13 | mmu-miR-18 |
| mmu-miR-43 | mmu-miR-49 | mmu-miR-67 | mmu-miR-76      | mmu-5S-b5  | mmu-miR-13 | mmu-miR-18 |
| mmu-miR-43 | mmu-miR-49 | mmu-miR-67 | mmu-miR-763     |            | mmu-miR-13 | mmu-miR-19 |
| mmu-miR-43 | mmu-miR-49 | mmu-miR-67 | mmu-miR-764-3p  |            | mmu-miR-13 | mmu-miR-19 |
| mmu-miR-43 | mmu-miR-49 | mmu-miR-67 | mmu-miR-764-5p  |            |            |            |
| mmu-miR-44 | mmu-miR-49 | mmu-miR-67 | mmu-miR-770-3p  |            |            |            |
| mmu-miR-44 | mmu-miR-49 | mmu-miR-67 | mmu-miR-770-5p  |            |            |            |
| mmu-miR-44 | mmu-miR-49 | mmu-miR-67 | mmu-miR-7a      |            |            |            |
| mmu-miR-44 | mmu-miR-49 | mmu-miR-67 | mmu-miR-7a*     |            |            |            |
| mmu-miR-45 | mmu-miR-50 | mmu-miR-67 | mmu-miR-7b      |            |            |            |
| mmu-miR-45 | mmu-miR-50 | mmu-miR-67 | mmu-miR-802     |            |            |            |
| mmu-miR-45 | mmu-miR-50 | mmu-miR-67 | mmu-miR-804     |            |            |            |
| mmu-miR-45 | mmu-miR-50 | mmu-miR-68 | mmu-miR-805     |            |            |            |
| mmu-miR-45 | mmu-miR-50 | mmu-miR-68 | mmu-miR-871     |            | mmu-let-7a | mmu-miR-13 |
| mmu-miR-45 | mmu-miR-50 | mmu-miR-68 | mmu-miR-872     |            | mmu-let-7a | mmu-miR-13 |
| mmu-miR-45 | mmu-miR-50 | mmu-miR-68 | mmu-miR-872*    |            | mmu-let-7b | mmu-miR-13 |
| mmu-miR-45 | mmu-miR-50 | mmu-miR-68 | mmu-miR-873     |            | mmu-let-7b | mmu-miR-13 |
| mmu-miR-45 | mmu-miR-50 | mmu-miR-68 | mmu-miR-874     |            | mmu-let-7c | mmu-miR-13 |
| mmu-miR-46 | mmu-miR-51 | mmu-miR-68 | mmu-miR-87      | BKG0       | mmu-let-7c | mmu-miR-13 |
| mmu-miR-46 | mmu-miR-53 | mmu-miR-68 | mmu-miR-87      | PUC2PM     | mmu-let-7d | mmu-miR-13 |
| mmu-miR-46 | mmu-miR-53 | mmu-miR-68 | mmu-miR-87      | PUC2MM     | mmu-let-7d | mmu-miR-13 |
| mmu-miR-46 | mmu-miR-53 | mmu-miR-68 | mmu-miR-87      | PUC2PM-20B | mmu-let-7e | mmu-miR-13 |

|            |            |             |            |            |            |            |
|------------|------------|-------------|------------|------------|------------|------------|
| mmu-miR-46 | mmu-miR-54 | mmu-miR-69  | mmu-miR-87 | PUC2MM-20B | mmu-let-7f | mmu-miR-13 |
| mmu-miR-46 | mmu-miR-54 | mmu-miR-69  | mmu-miR-87 | a2-PUC2PM- | mmu-let-7f | mmu-miR-13 |
| mmu-miR-46 | mmu-miR-54 | mmu-miR-69  | mmu-miR-87 | a2-PUC2MM- | mmu-let-7g | mmu-miR-14 |
| mmu-miR-46 | mmu-miR-54 | mmu-miR-69  | mmu-miR-87 | a3-PUC2PM- | mmu-let-7g | mmu-miR-14 |
| mmu-miR-46 | mmu-miR-54 | mmu-miR-69  | mmu-miR-87 | a3-PUC2MM- | mmu-let-7i | mmu-miR-14 |
| mmu-miR-46 | mmu-miR-54 | mmu-miR-69  | mmu-miR-87 | a-PUC2PM   | mmu-let-7i | mmu-miR-14 |
| mmu-miR-46 | mmu-miR-54 | mmu-miR-69  | mmu-miR-88 | a-PUC2MM2d | mmu-miR-1  | mmu-miR-14 |
| mmu-miR-46 | mmu-miR-54 | mmu-miR-69  | mmu-miR-88 | Ctr01-3P   | mmu-miR-10 | mmu-miR-14 |
| mmu-miR-46 | mmu-miR-54 | mmu-miR-69  | mmu-miR-88 | Ctr01-3M05 | mmu-miR-10 | mmu-miR-14 |
| mmu-miR-46 | mmu-miR-55 | mmu-miR-69  | mmu-miR-88 | Ctr01-3M10 | mmu-miR-10 | mmu-miR-14 |
| mmu-miR-46 | mmu-miR-56 | mmu-miR-69  | mmu-miR-88 | Ctr02-3P   | mmu-miR-10 | mmu-miR-14 |
| mmu-miR-46 | mmu-miR-57 | mmu-miR-70  | mmu-miR-88 | Ctr02-3M05 | mmu-miR-10 | mmu-miR-14 |
| mmu-miR-46 | mmu-miR-57 | mmu-miR-70  | mmu-miR-88 | Ctr02-3M10 | mmu-miR-10 | mmu-miR-14 |
| mmu-miR-46 | mmu-miR-58 | mmu-miR-70  | mmu-miR-88 | Ctr03-3P   | mmu-miR-10 | mmu-miR-14 |
| mmu-miR-46 | mmu-miR-58 | mmu-miR-70  | mmu-miR-9  | Ctr03-3M05 | mmu-miR-10 | mmu-miR-14 |
| mmu-miR-46 | mmu-miR-59 | mmu-miR-70  | mmu-miR-9* | Ctr03-3M10 | mmu-miR-10 | mmu-miR-14 |
| mmu-miR-46 | mmu-miR-59 | mmu-miR-70  | mmu-miR-92 | Ctr04-3P   | mmu-miR-10 | mmu-miR-14 |
| mmu-miR-46 | mmu-miR-59 | mmu-miR-70  | mmu-miR-92 | Ctr04-3M05 | mmu-miR-10 | mmu-miR-14 |
| mmu-miR-46 | mmu-miR-59 | mmu-miR-70  | mmu-miR-92 | Ctr04-3M10 | mmu-miR-10 | mmu-miR-14 |
| mmu-miR-46 | mmu-miR-61 | mmu-miR-70  | mmu-miR-93 | Ctr05-3P   | mmu-miR-10 | mmu-miR-14 |
| mmu-miR-46 | mmu-miR-61 | mmu-miR-70  | mmu-miR-93 | Ctr05-3M05 | mmu-miR-10 | mmu-miR-15 |
| mmu-miR-46 | mmu-miR-65 | mmu-miR-70  | mmu-miR-96 | Ctr05-3M10 | mmu-miR-11 | mmu-miR-15 |
| mmu-miR-46 | mmu-miR-65 | mmu-miR-71  | mmu-miR-98 | Ctr06-3P   | mmu-miR-11 | mmu-miR-15 |
| mmu-miR-46 | mmu-miR-65 | mmu-miR-71  | mmu-miR-99 | Ctr06-3M05 | mmu-miR-11 | mmu-miR-15 |
| mmu-miR-46 | mmu-miR-65 | mmu-miR-71  | mmu-miR-99 | Ctr06-3M10 | mmu-miR-11 | mmu-miR-15 |
| mmu-miR-46 | mmu-miR-66 | mmu-miR-71  | mmu-miR-99 | Ctr07-3P   | mmu-miR-11 | mmu-miR-15 |
| mmu-miR-46 | mmu-miR-66 | mmu-miR-713 |            | Ctr07-3M05 | mmu-miR-11 | mmu-miR-15 |
| mmu-miR-46 | mmu-miR-66 | mmu-miR-714 |            | Ctr07-3M10 | mmu-miR-11 | mmu-miR-15 |
| mmu-miR-46 | mmu-miR-66 | mmu-miR-715 |            | Ctr08-3P   | mmu-miR-11 | mmu-miR-15 |
| mmu-miR-46 | mmu-miR-66 | mmu-miR-717 |            | Ctr08-3M05 | mmu-miR-11 | mmu-miR-15 |
|            |            |             |            | Ctr08-3M10 | mmu-miR-11 | mmu-miR-15 |
|            |            |             |            | Ctr09-3P   | mmu-miR-11 | mmu-miR-15 |
|            |            |             |            | Ctr09-3M05 | mmu-miR-11 | mmu-miR-15 |
|            |            |             |            | Ctr09-3M10 | mmu-miR-11 | mmu-miR-16 |
|            |            |             |            | Ctr10-3P   | mmu-miR-12 | mmu-miR-16 |
|            |            |             |            | Ctr10-3M05 | mmu-miR-12 | mmu-miR-17 |
|            |            |             |            | Ctr10-3M10 | mmu-miR-12 | mmu-miR-17 |
|            |            |             |            | Ctr11-3P   | mmu-miR-12 | mmu-miR-18 |
|            |            |             |            | Ctr11-3M05 | mmu-miR-12 | mmu-miR-18 |
| mmu-miR-38 | mmu-miR-46 | mmu-miR-66  | mmu-miR-71 | Ctr11-3M10 | mmu-miR-12 | mmu-miR-18 |
| mmu-miR-38 | mmu-miR-46 | mmu-miR-66  | mmu-miR-71 | PUC2PM-20B | mmu-miR-12 | mmu-miR-18 |
| mmu-miR-40 | mmu-miR-46 | mmu-miR-66  | mmu-miR-72 | PUC2MM-20B | mmu-miR-12 | mmu-miR-18 |

|            |            |            |                |            |            |            |
|------------|------------|------------|----------------|------------|------------|------------|
| mmu-miR-40 | mmu-miR-47 | mmu-miR-66 | mmu-miR-72     | BKG0       | mmu-miR-12 | mmu-miR-18 |
| mmu-miR-41 | mmu-miR-47 | mmu-miR-66 | mmu-miR-74     | PUC2PM     | mmu-miR-12 | mmu-miR-18 |
| mmu-miR-41 | mmu-miR-47 | mmu-miR-66 | mmu-miR-74     | PUC2MM     | mmu-miR-12 | mmu-miR-18 |
| mmu-miR-41 | mmu-miR-48 | mmu-miR-66 | mmu-miR-74     | a2-PUC2PM- | mmu-miR-12 | mmu-miR-18 |
| mmu-miR-41 | mmu-miR-48 | mmu-miR-66 | mmu-miR-74     | a2-PUC2MM- | mmu-miR-12 | mmu-miR-18 |
| mmu-miR-42 | mmu-miR-48 | mmu-miR-66 | mmu-miR-74     | a3-PUC2PM- | mmu-miR-12 | mmu-miR-18 |
| mmu-miR-42 | mmu-miR-48 | mmu-miR-66 | mmu-miR-74     | a3-PUC2MM- | mmu-miR-12 | mmu-miR-18 |
| mmu-miR-42 | mmu-miR-48 | mmu-miR-66 | mmu-miR-744    |            | mmu-miR-12 | mmu-miR-18 |
| mmu-miR-42 | mmu-miR-48 | mmu-miR-66 | mmu-miR-744*   |            | mmu-miR-12 | mmu-miR-18 |
| mmu-miR-42 | mmu-miR-48 | mmu-miR-67 | mmu-miR-758    |            | mmu-miR-13 | mmu-miR-18 |
| mmu-miR-42 | mmu-miR-48 | mmu-miR-67 | mmu-miR-759    |            | mmu-miR-13 | mmu-miR-18 |
| mmu-miR-43 | mmu-miR-48 | mmu-miR-67 | mmu-miR-760    |            | mmu-miR-13 | mmu-miR-18 |
| mmu-miR-43 | mmu-miR-48 | mmu-miR-67 | mmu-miR-761    |            | mmu-miR-13 | mmu-miR-18 |
| mmu-miR-43 | mmu-miR-49 | mmu-miR-67 | mmu-miR-762    |            | mmu-miR-13 | mmu-miR-18 |
| mmu-miR-43 | mmu-miR-49 | mmu-miR-67 | mmu-miR-763    |            | mmu-miR-13 | mmu-miR-19 |
| mmu-miR-43 | mmu-miR-49 | mmu-miR-67 | mmu-miR-764-3p |            | mmu-miR-13 | mmu-miR-19 |
| mmu-miR-43 | mmu-miR-49 | mmu-miR-67 | mmu-miR-764-5p |            |            |            |
| mmu-miR-44 | mmu-miR-49 | mmu-miR-67 | mmu-miR-770-3p |            |            |            |
| mmu-miR-44 | mmu-miR-49 | mmu-miR-67 | mmu-miR-770-5p |            |            |            |
| mmu-miR-44 | mmu-miR-49 | mmu-miR-67 | mmu-miR-7a     |            |            |            |
| mmu-miR-44 | mmu-miR-49 | mmu-miR-67 | mmu-miR-7a*    |            |            |            |
| mmu-miR-45 | mmu-miR-50 | mmu-miR-67 | mmu-miR-7b     |            |            |            |
| mmu-miR-45 | mmu-miR-50 | mmu-miR-67 | mmu-miR-802    |            |            |            |
| mmu-miR-45 | mmu-miR-50 | mmu-miR-67 | mmu-miR-804    |            |            |            |
| mmu-miR-45 | mmu-miR-50 | mmu-miR-68 | mmu-miR-805    |            |            |            |
| mmu-miR-45 | mmu-miR-50 | mmu-miR-68 | mmu-miR-871    |            | mmu-let-7a | mmu-miR-13 |
| mmu-miR-45 | mmu-miR-50 | mmu-miR-68 | mmu-miR-872    |            | mmu-let-7a | mmu-miR-13 |
| mmu-miR-45 | mmu-miR-50 | mmu-miR-68 | mmu-miR-872*   |            | mmu-let-7b | mmu-miR-13 |
| mmu-miR-45 | mmu-miR-50 | mmu-miR-68 | mmu-miR-873    |            | mmu-let-7b | mmu-miR-13 |
| mmu-miR-45 | mmu-miR-50 | mmu-miR-68 | mmu-miR-874    |            | mmu-let-7c | mmu-miR-13 |
| mmu-miR-46 | mmu-miR-51 | mmu-miR-68 | mmu-miR-875-3p |            | mmu-let-7c | mmu-miR-13 |
| mmu-miR-46 | mmu-miR-53 | mmu-miR-68 | mmu-miR-875-5p |            | mmu-let-7d | mmu-miR-13 |
| mmu-miR-46 | mmu-miR-53 | mmu-miR-68 | mmu-miR-876-3p |            | mmu-let-7d | mmu-miR-13 |
| mmu-miR-46 | mmu-miR-53 | mmu-miR-68 | mmu-miR-876-5p |            | mmu-let-7e | mmu-miR-13 |
| mmu-miR-46 | mmu-miR-54 | mmu-miR-69 | mmu-miR-877    |            | mmu-let-7f | mmu-miR-13 |
| mmu-miR-46 | mmu-miR-54 | mmu-miR-69 | mmu-miR-877*   |            | mmu-let-7f | mmu-miR-13 |
| mmu-miR-46 | mmu-miR-54 | mmu-miR-69 | mmu-miR-878-3p |            | mmu-let-7g | mmu-miR-14 |
| mmu-miR-46 | mmu-miR-54 | mmu-miR-69 | mmu-miR-878-5p |            | mmu-let-7g | mmu-miR-14 |
| mmu-miR-46 | mmu-miR-54 | mmu-miR-69 | mmu-miR-87     | a2-PUC2PM- | mmu-let-7i | mmu-miR-14 |
| mmu-miR-46 | mmu-miR-54 | mmu-miR-69 | mmu-miR-87     | a2-PUC2MM- | mmu-let-7i | mmu-miR-14 |
| mmu-miR-46 | mmu-miR-54 | mmu-miR-69 | mmu-miR-88     | a3-PUC2PM- | mmu-miR-1  | mmu-miR-14 |
| mmu-miR-46 | mmu-miR-54 | mmu-miR-69 | mmu-miR-88     | a3-PUC2MM- | mmu-miR-10 | mmu-miR-14 |



|            |            |            |            |            |            |            |
|------------|------------|------------|------------|------------|------------|------------|
| mmu-miR-46 | mmu-miR-54 | mmu-miR-69 | mmu-miR-88 | PUC2PM-20B | mmu-miR-10 | mmu-miR-14 |
| mmu-miR-46 | mmu-miR-55 | mmu-miR-69 | mmu-miR-88 | PUC2MM-20B | mmu-miR-10 | mmu-miR-14 |
| mmu-miR-46 | mmu-miR-56 | mmu-miR-69 | mmu-miR-88 | BKG0       | mmu-miR-10 | mmu-miR-14 |
|            |            |            |            | PUC2PM     |            |            |
|            |            |            |            | PUC2MM     |            |            |

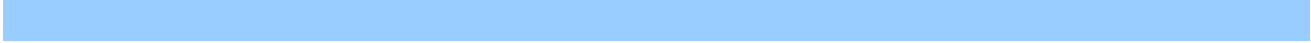





mmu-miR-21|mmu-miR-30|mmu-miR-37 mmu-miR-46 mmu-miR-58|mmu-miR-70|mmu-miR-9  
mmu-miR-21|mmu-miR-30|mmu-miR-37 mmu-miR-46 mmu-miR-59|mmu-miR-70|mmu-miR-9\*  
mmu-miR-21 mmu-miR-30|mmu-miR-37 mmu-miR-46 mmu-miR-59|mmu-miR-70|mmu-miR-92|  
mmu-miR-22 mmu-miR-30|mmu-miR-37 mmu-miR-46 mmu-miR-59|mmu-miR-70 mmu-miR-92|  
mmu-miR-22 mmu-miR-30|mmu-miR-37 mmu-miR-46 mmu-miR-59|mmu-miR-70|mmu-miR-92|  
mmu-miR-22|mmu-miR-30|mmu-miR-37 mmu-miR-46 mmu-miR-61|mmu-miR-70|mmu-miR-93  
mmu-miR-22|mmu-miR-30|mmu-miR-37|mmu-miR-46|mmu-miR-61|mmu-miR-70|mmu-miR-93  
mmu-miR-22|mmu-miR-30|mmu-miR-37|mmu-miR-46|mmu-miR-65|mmu-miR-70 mmu-miR-96  
mmu-miR-22|mmu-miR-31 mmu-miR-37|mmu-miR-46|mmu-miR-65|mmu-miR-71|mmu-miR-98  
mmu-miR-22|mmu-miR-31|mmu-miR-37 mmu-miR-46|mmu-miR-65|mmu-miR-71|mmu-miR-99|  
mmu-miR-23|mmu-miR-32 mmu-miR-38|mmu-miR-46|mmu-miR-65|mmu-miR-71|mmu-miR-99|  
mmu-miR-23|mmu-miR-32|mmu-miR-38|mmu-miR-46|mmu-miR-66|mmu-miR-71|mmu-miR-99|  
mmu-miR-24 mmu-miR-32|mmu-miR-38|mmu-miR-46|mmu-miR-66 mmu-miR-713  
mmu-miR-24 mmu-miR-32|mmu-miR-38|mmu-miR-46|mmu-miR-66 mmu-miR-714  
mmu-miR-24 mmu-miR-32|mmu-miR-38|mmu-miR-46|mmu-miR-66|mmu-miR-715  
mmu-miR-25 mmu-miR-32|mmu-miR-38 mmu-miR-46|mmu-miR-66|mmu-miR-717

mmu-miR-19|mmu-miR-26|mmu-miR-32|mmu-miR-38|mmu-miR-46|mmu-miR-66 mmu-miR-71|  
mmu-miR-19|mmu-miR-26|mmu-miR-32|mmu-miR-38|mmu-miR-46|mmu-miR-66 mmu-miR-71|  
mmu-miR-19|mmu-miR-26|mmu-miR-32|mmu-miR-40 mmu-miR-46 mmu-miR-66 mmu-miR-72|  
mmu-miR-19|mmu-miR-27|mmu-miR-32|mmu-miR-40 mmu-miR-47|mmu-miR-66 mmu-miR-72|  
mmu-miR-19|mmu-miR-27|mmu-miR-32 mmu-miR-41|mmu-miR-47|mmu-miR-66 mmu-miR-74|  
mmu-miR-19|mmu-miR-27|mmu-miR-32|mmu-miR-41|mmu-miR-47|mmu-miR-66 mmu-miR-74|  
mmu-miR-19|mmu-miR-27|mmu-miR-32|mmu-miR-41|mmu-miR-48|mmu-miR-66 mmu-miR-74|  
mmu-miR-19|mmu-miR-28 mmu-miR-32 mmu-miR-41|mmu-miR-48|mmu-miR-66 mmu-miR-74|  
mmu-miR-19 mmu-miR-28|mmu-miR-33 mmu-miR-42|mmu-miR-48|mmu-miR-66 mmu-miR-74|  
mmu-miR-19 mmu-miR-29|mmu-miR-33 mmu-miR-42|mmu-miR-48|mmu-miR-66 mmu-miR-74|  
mmu-miR-19 mmu-miR-29|mmu-miR-33|mmu-miR-42|mmu-miR-48|mmu-miR-66 mmu-miR-74|  
mmu-miR-19|mmu-miR-29|mmu-miR-33|mmu-miR-42|mmu-miR-48 mmu-miR-66 mmu-miR-74|  
mmu-miR-19 mmu-miR-29|mmu-miR-33|mmu-miR-42|mmu-miR-48|mmu-miR-66 mmu-miR-74|  
mmu-miR-19 mmu-miR-29|mmu-miR-33|mmu-miR-42|mmu-miR-48|mmu-miR-67|mmu-miR-75|  
mmu-miR-19 mmu-miR-29|mmu-miR-33|mmu-miR-42 mmu-miR-48|mmu-miR-67|mmu-miR-75  
mmu-miR-19 mmu-miR-29|mmu-miR-33|mmu-miR-43|mmu-miR-48|mmu-miR-67|mmu-miR-76|  
mmu-miR-19|mmu-miR-29|mmu-miR-33|mmu-miR-43|mmu-miR-48 mmu-miR-67|mmu-miR-76|  
mmu-miR-19|mmu-miR-29|mmu-miR-33|mmu-miR-43|mmu-miR-49|mmu-miR-67|mmu-miR-76|

mmu-miR-19|mmu-miR-29|mmu-miR-33|mmu-miR-43|mmu-miR-49|mmu-miR-67|mmu-miR-76  
mmu-miR-20|mmu-miR-29|mmu-miR-33|mmu-miR-43|mmu-miR-49|mmu-miR-67|mmu-miR-76  
mmu-miR-20|mmu-miR-29|mmu-miR-33|mmu-miR-43|mmu-miR-49|mmu-miR-67|mmu-miR-76

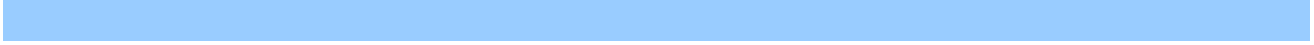



|            |                                                                   |
|------------|-------------------------------------------------------------------|
| PUC2MM-20B | mmu-miR-12 mmu-miR-18 mmu-miR-22 mmu-miR-30 mmu-miR-37 mmu-miR-46 |
| a2-PUC2PM- | mmu-miR-12 mmu-miR-18 mmu-miR-22 mmu-miR-30 mmu-miR-37 mmu-miR-46 |
| a2-PUC2MM- | mmu-miR-1 mmu-miR-18 mmu-miR-22 mmu-miR-31 mmu-miR-37 mmu-miR-46  |
| a3-PUC2PM- | mmu-miR-13 mmu-miR-18 mmu-miR-22 mmu-miR-31 mmu-miR-37 mmu-miR-46 |
| a3-PUC2MM- | mmu-miR-13 mmu-miR-18 mmu-miR-23 mmu-miR-32 mmu-miR-38 mmu-miR-46 |
| a-PUC2PM   | mmu-miR-13 mmu-miR-18 mmu-miR-23 mmu-miR-32 mmu-miR-38 mmu-miR-46 |
| a-PUC2MM2d | mmu-miR-13 mmu-miR-18 mmu-miR-24 mmu-miR-32 mmu-miR-38 mmu-miR-46 |
| Ctr01-3P   | mmu-miR-13 mmu-miR-18 mmu-miR-24 mmu-miR-32 mmu-miR-38 mmu-miR-46 |
| Ctr01-3M05 | mmu-miR-13 mmu-miR-19 mmu-miR-24 mmu-miR-32 mmu-miR-38 mmu-miR-46 |
| Ctr01-3M10 | mmu-miR-13 mmu-miR-19 mmu-miR-25 mmu-miR-32 mmu-miR-38 mmu-miR-46 |
| Ctr02-3P   |                                                                   |
| Ctr02-3M05 |                                                                   |
| Ctr02-3M10 |                                                                   |
| Ctr03-3P   |                                                                   |
| Ctr03-3M05 |                                                                   |
| Ctr03-3M10 |                                                                   |
| Ctr04-3P   |                                                                   |
| Ctr04-3M05 |                                                                   |
| Ctr04-3M10 |                                                                   |
| Ctr05-3P   | mmu-let-7a mmu-miR-13 mmu-miR-19 mmu-miR-26 mmu-miR-32 mmu-miR-38 |
| Ctr05-3M05 | mmu-let-7a mmu-miR-13 mmu-miR-19 mmu-miR-26 mmu-miR-32 mmu-miR-38 |
| Ctr05-3M10 | mmu-let-7b mmu-miR-13 mmu-miR-19 mmu-miR-26 mmu-miR-32 mmu-miR-40 |
| Ctr06-3P   | mmu-let-7b mmu-miR-13 mmu-miR-19 mmu-miR-27 mmu-miR-32 mmu-miR-40 |
| Ctr06-3M05 | mmu-let-7c mmu-miR-13 mmu-miR-19 mmu-miR-27 mmu-miR-32 mmu-miR-41 |
| Ctr06-3M10 | mmu-let-7c mmu-miR-13 mmu-miR-19 mmu-miR-27 mmu-miR-32 mmu-miR-41 |
| Ctr07-3P   | mmu-let-7d mmu-miR-13 mmu-miR-19 mmu-miR-27 mmu-miR-32 mmu-miR-41 |
| Ctr07-3M05 | mmu-let-7d mmu-miR-13 mmu-miR-19 mmu-miR-28 mmu-miR-32 mmu-miR-41 |
| Ctr07-3M10 | mmu-let-7e mmu-miR-13 mmu-miR-19 mmu-miR-28 mmu-miR-33 mmu-miR-42 |
| Ctr08-3P   | mmu-let-7f mmu-miR-13 mmu-miR-19 mmu-miR-29 mmu-miR-33 mmu-miR-42 |
| Ctr08-3M05 | mmu-let-7f mmu-miR-13 mmu-miR-19 mmu-miR-29 mmu-miR-33 mmu-miR-42 |
| Ctr08-3M10 | mmu-let-7g mmu-miR-14 mmu-miR-19 mmu-miR-29 mmu-miR-33 mmu-miR-42 |
| Ctr09-3P   | mmu-let-7g mmu-miR-14 mmu-miR-19 mmu-miR-29 mmu-miR-33 mmu-miR-42 |
| Ctr09-3M05 | mmu-let-7i mmu-miR-14 mmu-miR-19 mmu-miR-29 mmu-miR-33 mmu-miR-42 |
| Ctr09-3M10 | mmu-let-7i mmu-miR-14 mmu-miR-19 mmu-miR-29 mmu-miR-33 mmu-miR-43 |
| Ctr10-3P   | mmu-miR-1 mmu-miR-14 mmu-miR-19 mmu-miR-29 mmu-miR-33 mmu-miR-43  |
| Ctr10-3M05 | mmu-miR-10 mmu-miR-14 mmu-miR-19 mmu-miR-29 mmu-miR-33 mmu-miR-43 |
| Ctr10-3M10 | mmu-miR-10 mmu-miR-14 mmu-miR-19 mmu-miR-29 mmu-miR-33 mmu-miR-43 |
| Ctr11-3P   | mmu-miR-10 mmu-miR-14 mmu-miR-20 mmu-miR-29 mmu-miR-33 mmu-miR-43 |
| Ctr11-3M05 | mmu-miR-10 mmu-miR-14 mmu-miR-20 mmu-miR-29 mmu-miR-33 mmu-miR-43 |
| Ctr11-3M10 | mmu-miR-10 mmu-miR-14 mmu-miR-20 mmu-miR-29 mmu-miR-33 mmu-miR-44 |
| PUC2PM-20B | mmu-miR-10 mmu-miR-14 mmu-miR-20 mmu-miR-29 mmu-miR-33 mmu-miR-44 |
| PUC2MM-20B | mmu-miR-10 mmu-miR-14 mmu-miR-20 mmu-miR-29 mmu-miR-34 mmu-miR-44 |





PUC2PM-20B mmu-miR-13:mmu-miR-19:mmu-miR-24:mmu-miR-32:mmu-miR-38:mmu-miR-46'

PUC2MM-20B mmu-miR-13:mmu-miR-19:mmu-miR-25:mmu-miR-32:mmu-miR-38:mmu-miR-46'

BKG0

PUC2PM

PUC2MM

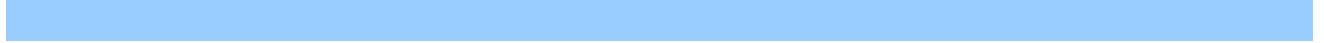

| C28        | C29        | C30             | C31           | stop |
|------------|------------|-----------------|---------------|------|
|            |            |                 | PUC2PM        |      |
| mmu-miR-49 | mmu-miR-67 | mmu-miR-77      | PUC2MM        |      |
| mmu-miR-49 | mmu-miR-67 | mmu-miR-77      | BKG0          |      |
| mmu-miR-49 | mmu-miR-67 | mmu-miR-7a      | PUC2PM-20B    |      |
| mmu-miR-49 | mmu-miR-67 | mmu-miR-7a      | PUC2MM-20B    |      |
| mmu-miR-50 | mmu-miR-67 | mmu-miR-7b      | a2-PUC2PM-20B |      |
| mmu-miR-50 | mmu-miR-67 | mmu-miR-80      | a2-PUC2MM-20B |      |
| mmu-miR-50 | mmu-miR-67 | mmu-miR-80      | a3-PUC2PM-20B |      |
| mmu-miR-50 | mmu-miR-68 | mmu-miR-80      | a3-PUC2MM-20B |      |
| mmu-miR-50 | mmu-miR-68 | mmu-miR-871     |               |      |
| mmu-miR-50 | mmu-miR-68 | mmu-miR-872     |               |      |
| mmu-miR-50 | mmu-miR-68 | mmu-miR-872*    |               |      |
| mmu-miR-50 | mmu-miR-68 | mmu-miR-873     |               |      |
| mmu-miR-50 | mmu-miR-68 | mmu-miR-87      | mmu-5S-b1     |      |
| mmu-miR-51 | mmu-miR-68 | mmu-miR-87      | mmu-5S-b2     |      |
| mmu-miR-53 | mmu-miR-68 | mmu-miR-87      | mmu-5S-b3     |      |
| mmu-miR-53 | mmu-miR-68 | mmu-miR-87      | mmu-5S-b4     |      |
| mmu-miR-53 | mmu-miR-68 | mmu-miR-87      | mmu-5S-b5     |      |
| mmu-miR-54 | mmu-miR-69 | mmu-miR-877     |               |      |
| mmu-miR-54 | mmu-miR-69 | mmu-miR-877*    |               |      |
| mmu-miR-54 | mmu-miR-69 | mmu-miR-878-3p  |               |      |
| mmu-miR-54 | mmu-miR-69 | mmu-miR-878-5p  |               |      |
| mmu-miR-54 | mmu-miR-69 | mmu-miR-879     |               |      |
| mmu-miR-54 | mmu-miR-69 | mmu-miR-879*    |               |      |
| mmu-miR-54 | mmu-miR-69 | mmu-miR-880     |               |      |
| mmu-miR-54 | mmu-miR-69 | mmu-miR-881     |               |      |
| mmu-miR-54 | mmu-miR-69 | mmu-miR-881*    |               |      |
| mmu-miR-55 | mmu-miR-69 | mmu-miR-882     |               |      |
| mmu-miR-56 | mmu-miR-69 | mmu-miR-883a-3p |               |      |
| mmu-miR-57 | mmu-miR-70 | mmu-miR-883a-5p |               |      |
| mmu-miR-57 | mmu-miR-70 | mmu-miR-883b-3p |               |      |
| mmu-miR-58 | mmu-miR-70 | mmu-miR-883b-5p |               |      |
| mmu-miR-58 | mmu-miR-70 | mmu-miR-9       |               |      |
| mmu-miR-59 | mmu-miR-70 | mmu-miR-9*      |               |      |
| mmu-miR-59 | mmu-miR-70 | mmu-miR-92      | BKG0          |      |
| mmu-miR-59 | mmu-miR-70 | mmu-miR-92      | PUC2PM        |      |
| mmu-miR-59 | mmu-miR-70 | mmu-miR-92      | PUC2MM        |      |
| mmu-miR-61 | mmu-miR-70 | mmu-miR-93      | PUC2PM-20B    |      |

|                                  |               |
|----------------------------------|---------------|
| mmu-miR-61;mmu-miR-70;mmu-miR-93 | PUC2MM-20B    |
| mmu-miR-65;mmu-miR-70;mmu-miR-96 | a2-PUC2PM-20B |
| mmu-miR-65;mmu-miR-71;mmu-miR-98 | a2-PUC2MM-20B |
| mmu-miR-65;mmu-miR-71;mmu-miR-99 | a3-PUC2PM-20B |
| mmu-miR-65;mmu-miR-71;mmu-miR-99 | a3-PUC2MM-20B |
| mmu-miR-66;mmu-miR-71;mmu-miR-99 | a-PUC2PM      |
| mmu-miR-66;mmu-miR-713           | a-PUC2MM2d    |
| mmu-miR-66;mmu-miR-714           | Ctr01-3P      |
| mmu-miR-66;mmu-miR-715           | Ctr01-3M05    |
| mmu-miR-66;mmu-miR-717           | Ctr01-3M10    |
|                                  | Ctr02-3P      |
|                                  | Ctr02-3M05    |
|                                  | Ctr02-3M10    |
|                                  | Ctr03-3P      |
|                                  | Ctr03-3M05    |
|                                  | Ctr03-3M10    |
|                                  | Ctr04-3P      |
|                                  | Ctr04-3M05    |
|                                  | Ctr04-3M10    |
| mmu-miR-46;mmu-miR-66;mmu-miR-71 | Ctr05-3P      |
| mmu-miR-46;mmu-miR-66;mmu-miR-71 | Ctr05-3M05    |
| mmu-miR-46;mmu-miR-66;mmu-miR-72 | Ctr05-3M10    |
| mmu-miR-47;mmu-miR-66;mmu-miR-72 | Ctr06-3P      |
| mmu-miR-47;mmu-miR-66;mmu-miR-74 | Ctr06-3M05    |
| mmu-miR-47;mmu-miR-66;mmu-miR-74 | Ctr06-3M10    |
| mmu-miR-48;mmu-miR-66;mmu-miR-74 | Ctr07-3P      |
| mmu-miR-48;mmu-miR-66;mmu-miR-74 | Ctr07-3M05    |
| mmu-miR-48;mmu-miR-66;mmu-miR-74 | Ctr07-3M10    |
| mmu-miR-48;mmu-miR-66;mmu-miR-74 | Ctr08-3P      |
| mmu-miR-48;mmu-miR-66;mmu-miR-74 | Ctr08-3M05    |
| mmu-miR-48;mmu-miR-66;mmu-miR-74 | Ctr08-3M10    |
| mmu-miR-48;mmu-miR-67;mmu-miR-75 | Ctr09-3P      |
| mmu-miR-48;mmu-miR-67;mmu-miR-75 | Ctr09-3M05    |
| mmu-miR-48;mmu-miR-67;mmu-miR-76 | Ctr09-3M10    |
| mmu-miR-48;mmu-miR-67;mmu-miR-76 | Ctr10-3P      |
| mmu-miR-49;mmu-miR-67;mmu-miR-76 | Ctr10-3M05    |
| mmu-miR-49;mmu-miR-67;mmu-miR-76 | Ctr10-3M10    |
| mmu-miR-49;mmu-miR-67;mmu-miR-76 | Ctr11-3P      |
| mmu-miR-49;mmu-miR-67;mmu-miR-76 | Ctr11-3M05    |
| mmu-miR-49;mmu-miR-67;mmu-miR-77 | Ctr11-3M10    |
| mmu-miR-49;mmu-miR-67;mmu-miR-77 | PUC2PM-20B    |
| mmu-miR-49;mmu-miR-67;mmu-miR-7a | PUC2MM-20B    |

|            |             |                 |               |
|------------|-------------|-----------------|---------------|
| mmu-miR-49 | mmu-miR-67  | mmu-miR-7a      | BKG0          |
| mmu-miR-50 | mmu-miR-67  | mmu-miR-7b      | PUC2PM        |
| mmu-miR-50 | mmu-miR-67  | mmu-miR-80      | PUC2MM        |
| mmu-miR-50 | mmu-miR-67  | mmu-miR-80      | a2-PUC2PM-20B |
| mmu-miR-50 | mmu-miR-68  | mmu-miR-80      | a2-PUC2MM-20B |
| mmu-miR-50 | mmu-miR-68  | mmu-miR-87      | a3-PUC2PM-20B |
| mmu-miR-50 | mmu-miR-68  | mmu-miR-87      | a3-PUC2MM-20B |
| mmu-miR-50 | mmu-miR-68  | mmu-miR-872*    |               |
| mmu-miR-50 | mmu-miR-68  | mmu-miR-873     |               |
| mmu-miR-50 | mmu-miR-68  | mmu-miR-874     |               |
| mmu-miR-51 | mmu-miR-68  | mmu-miR-875-3p  |               |
| mmu-miR-53 | mmu-miR-68  | mmu-miR-875-5p  |               |
| mmu-miR-53 | mmu-miR-68  | mmu-miR-876-3p  |               |
| mmu-miR-53 | mmu-miR-68  | mmu-miR-876-5p  |               |
| mmu-miR-54 | mmu-miR-69  | mmu-miR-877     |               |
| mmu-miR-54 | mmu-miR-69  | mmu-miR-877*    |               |
| mmu-miR-54 | mmu-miR-69  | mmu-miR-878-3p  |               |
| mmu-miR-54 | mmu-miR-69  | mmu-miR-878-5p  |               |
| mmu-miR-54 | mmu-miR-69  | mmu-miR-879     |               |
| mmu-miR-54 | mmu-miR-69  | mmu-miR-879*    |               |
| mmu-miR-54 | mmu-miR-69  | mmu-miR-880     |               |
| mmu-miR-54 | mmu-miR-69  | mmu-miR-881     |               |
| mmu-miR-54 | mmu-miR-69  | mmu-miR-881*    |               |
| mmu-miR-55 | mmu-miR-69  | mmu-miR-882     |               |
| mmu-miR-56 | mmu-miR-69  | mmu-miR-883a-3p |               |
| mmu-miR-57 | mmu-miR-70  | mmu-miR-883a-5p |               |
| mmu-miR-57 | mmu-miR-70  | mmu-miR-883b-3p |               |
| mmu-miR-58 | mmu-miR-70  | mmu-miR-883b-5p |               |
| mmu-miR-58 | mmu-miR-70  | mmu-miR-9       |               |
| mmu-miR-59 | mmu-miR-70  | mmu-miR-9*      |               |
| mmu-miR-59 | mmu-miR-70  | mmu-miR-92a     |               |
| mmu-miR-59 | mmu-miR-70  | mmu-miR-92a*    |               |
| mmu-miR-59 | mmu-miR-70  | mmu-miR-92b     |               |
| mmu-miR-61 | mmu-miR-70  | mmu-miR-93      |               |
| mmu-miR-61 | mmu-miR-70  | mmu-miR-93*     |               |
| mmu-miR-65 | mmu-miR-70  | mmu-miR-96      |               |
| mmu-miR-65 | mmu-miR-71  | mmu-miR-98      |               |
| mmu-miR-65 | mmu-miR-71  | mmu-miR-99a     |               |
| mmu-miR-65 | mmu-miR-71  | mmu-miR-99      | a2-PUC2PM-20B |
| mmu-miR-66 | mmu-miR-71  | mmu-miR-99      | a2-PUC2MM-20B |
| mmu-miR-66 | mmu-miR-713 |                 | a3-PUC2PM-20B |
| mmu-miR-66 | mmu-miR-714 |                 | a3-PUC2MM-20B |

mmu-miR-66;mmu-miR-715  
mmu-miR-66;mmu-miR-717

PUC2PM-20B

PUC2MM-20B

BKG0

PUC2PM

PUC2MM
